# Supplementary material for: Promotional effect of Ti doping on the ketonization of acetic acid over a CeO2 catalyst
Source: Royal Society of Chemistry journal article supplement (doi:10.1039/c7ra00521k), 2017-01-01
Supplement: c7ra00521k1.pdf [file c7ra00521k1.pdf]

# Supporting Information for

## Promotional Effect of Ti Doping on the Ketonization of Acetic Acid over CeO<sub>2</sub> Catalyst

Feipeng Lu<sup>a</sup>, BinBo Jiang<sup>a\*</sup>, Jingdai Wang<sup>a</sup>, Zhengliang Huang<sup>a</sup>, Zuwei Liao<sup>a</sup>, Yongrong  
Yang<sup>a</sup>, Jie Zheng<sup>b\*</sup>

<sup>a</sup>State Key Laboratory of Chemical Engineering, College of Chemical and Biological  
Engineering, Zhejiang University, Hangzhou 310027, P.R. China

<sup>b</sup>Department of Chemical and Biomolecular Engineering, The University of Akron, Akron,  
Ohio, USA 44325

### Results

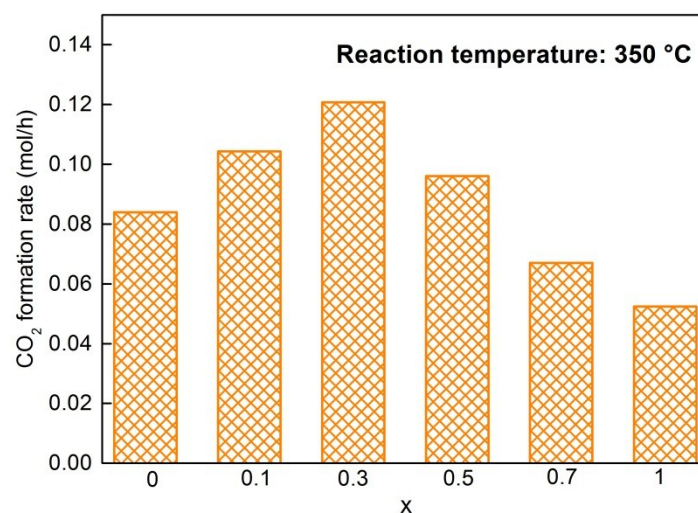

**Fig.S1.** CO<sub>2</sub> formation rate in the ketonization of acetic acid of Ce<sub>1-x</sub>Ti<sub>x</sub>O<sub>2-δ</sub> catalysts at 350 °C.

**Table S1** Ketonization activity of acetic acid into acetone over different catalysts.

| Entry | Catalyst                                                 | Conv./<br>% | Yield/<br>% | Select.<br>/% | Reaction condition                 | Ref. |
|-------|----------------------------------------------------------|-------------|-------------|---------------|------------------------------------|------|
| 1     | CeO <sub>2</sub>                                         | 51          | 51          |               | 350°C, WHSV=5.6 h <sup>-1</sup>    | [1]  |
| 2     | Pr <sub>6</sub> O <sub>11</sub>                          | 80          | 80          |               | 350°C, WHSV=5.6 h <sup>-1</sup>    | [1]  |
| 3     | ZnO-Al <sub>2</sub> O <sub>3</sub><br>(3:1) <sup>a</sup> | 89          |             |               | 350°C, WHSV=0.57 h <sup>-1</sup>   | [2]  |
| 4     | Zn-Cr (10:1)                                             | 86          |             | 100           | 350°C, W/F=4 h·g·mol <sup>-1</sup> | [3]  |
| 5     | CeO <sub>2</sub> -ZrO <sub>2</sub>                       | 95          |             |               | 450°C, WHSV=~146 h <sup>-1</sup>   | [4]  |
| 6     | CeO <sub>2</sub> -Mn <sub>2</sub> O <sub>3</sub>         | 72          |             |               | 450°C, WHSV=~146 h <sup>-1</sup>   | [4]  |

<sup>a</sup> layered double hydroxides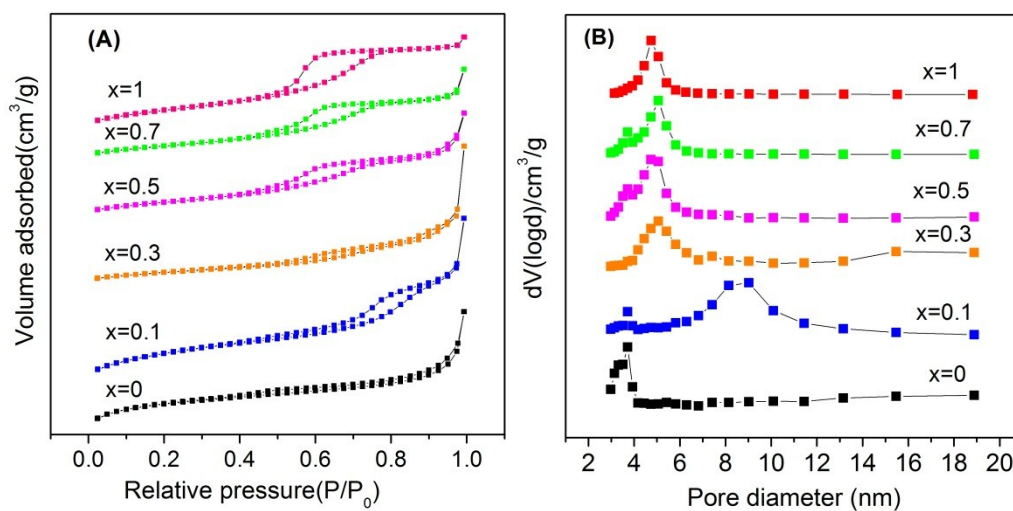

**Fig.S2.**  $\text{N}_2$  adsorption-desorption isotherms (A) and pore size distributions (B) of  $\text{Ce}_{1-x}\text{Ti}_x\text{O}_{2-\delta}$  catalysts.

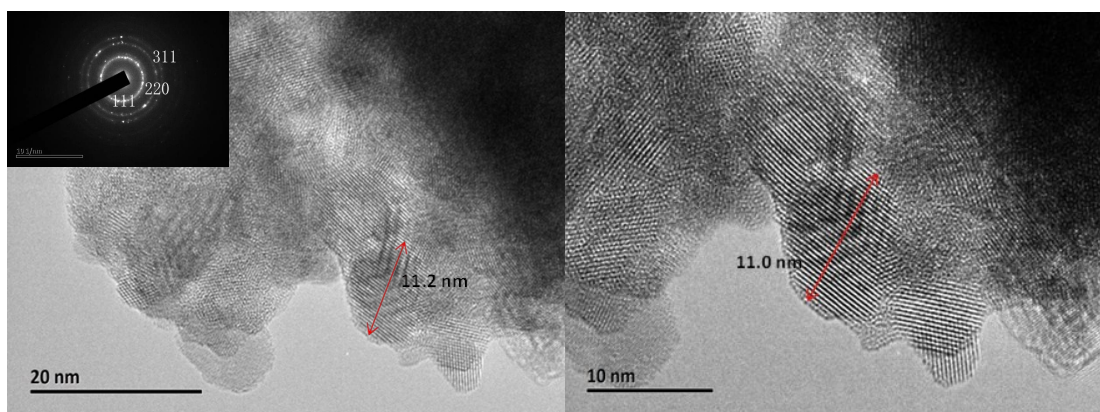

**Fig.S3.** TEM micrographs of the  $\text{Ce}_{0.7}\text{Ti}_{0.3}\text{O}_{2-\delta}$  sample.

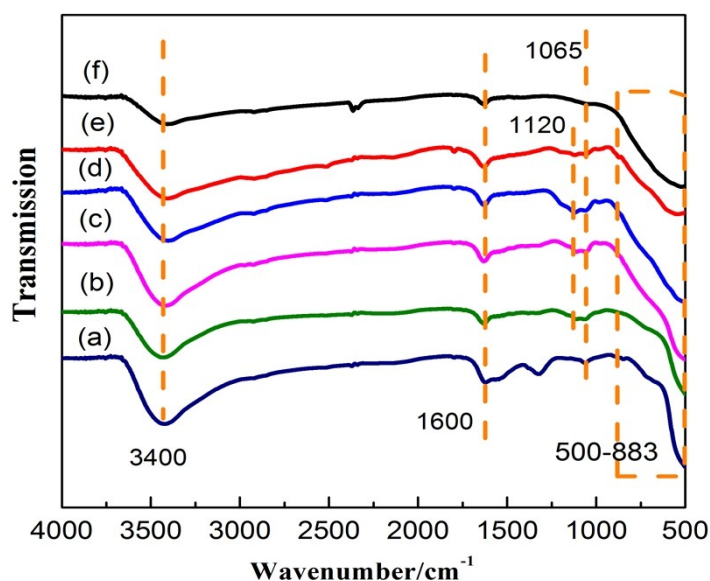

**Figure S4.** FTIR spectra of  $Ce_{1-x}Ti_xO_{2-\delta}$  catalysts at (a)  $x=0$ , (b)  $x=0.1$ , (c)  $x=0.3$ , (d)  $x=0.5$ , (e)  $x=0.7$ , and (f)  $x=1$ .

**Table S2** Hydrogen Consumption Estimated from Temperature-Programmed Reduction

| x   | H <sub>2</sub> consumption(mmol/g) <sup>a</sup> | Peak value |
|-----|-------------------------------------------------|------------|
| 0   | 0.183                                           | 504.4      |
| 0.1 | 0.53854                                         | 507.7      |
| 0.3 | 0.62496                                         | 510.3      |
| 0.5 | 0.86899                                         | 553.1      |
| 0.7 | 0.77552                                         | 589.6      |
| 1   | 0.06781                                         | --         |

<sup>a</sup> The H<sub>2</sub> consumption was calculated from the integration of TPR area.

**Table S3** Acid sites distribution based on NH<sub>3</sub>-TPD data and basic sites distribution based on CO<sub>2</sub>-TPD data for  $Ce_{1-x}Ti_xO_{2-\delta}$  catalysts.

| x   | Acid sites/ $\mu\text{mol}\cdot\text{m}^{-2}$ |                    |        | Basic sites/ $\mu\text{mol}\cdot\text{m}^{-2}$ |                    |        |
|-----|-----------------------------------------------|--------------------|--------|------------------------------------------------|--------------------|--------|
|     | Weak (323-523 K)                              | Strong (523-773 K) | Tota l | Weak (323-523 K)                               | Strong (523-773 K) | Tota l |
| 0   | 1.87                                          | 0.24               | 2.11   | 2.82                                           | 0.07               | 2.89   |
| 0.1 | 2.81                                          | 0.39               | 3.21   | 2.70                                           | 0.21               | 2.91   |
| 0.3 | 3.67                                          | 0.73               | 4.40   | 3.57                                           | 0.51               | 4.08   |
| 0.5 | 2.88                                          | 2.17               | 5.05   | 2.25                                           | 0.75               | 3.00   |
| 0.7 | 2.79                                          | 2.18               | 4.98   | 2.26                                           | 1.46               | 3.72   |
| 1   | 2.14                                          | 3.91               | 6.05   | 1.72                                           | 3.36               | 5.09   |

**Table S4** Ce3d XPS results of  $Ce_xTi_{1-x}O_{2-\delta}$  catalysts

| Catalyst                       | BE, eV |       |       |       |       |       |       |       | Binding energy, eV |           |            |
|--------------------------------|--------|-------|-------|-------|-------|-------|-------|-------|--------------------|-----------|------------|
|                                | v      | v'    | v''   | v'''  | u     | u'    | u''   | u'''  | $O_\alpha$         | $O_\beta$ | $O_\gamma$ |
| $CeO_2$                        | 882.7  | 885.2 | 888.8 | 898.2 | 901.2 | 903.7 | 907.3 | 916.7 | 529.1              | 531.2     | --         |
| $Ce_{0.9}Ti_{0.1}O_{2-\delta}$ | 882.4  | 885.0 | 889.2 | 898.9 | 900.9 | 903.5 | 907.7 | 917.4 | 529.2              | 531.2     | --         |
| $Ce_{0.7}Ti_{0.3}O_{2-\delta}$ | 882.8  | 885.8 | 888.9 | 898.2 | 901.3 | 904.3 | 907.4 | 917.6 | 529.3              | 531.3     | --         |
| $Ce_{0.5}Ti_{0.5}O_{2-\delta}$ | 882.8  | 885.6 | 889.5 | 899.2 | 901.3 | 904.1 | 908.0 | 917.7 | 529.4              | 531.3     | 533.4      |
| $Ce_{0.3}Ti_{0.7}O_{2-\delta}$ | 883.4  | 886.0 | 890.3 | 900.4 | 901.9 | 904.5 | 908.8 | 918.9 | 529.7              | 531.5     | 533.5      |

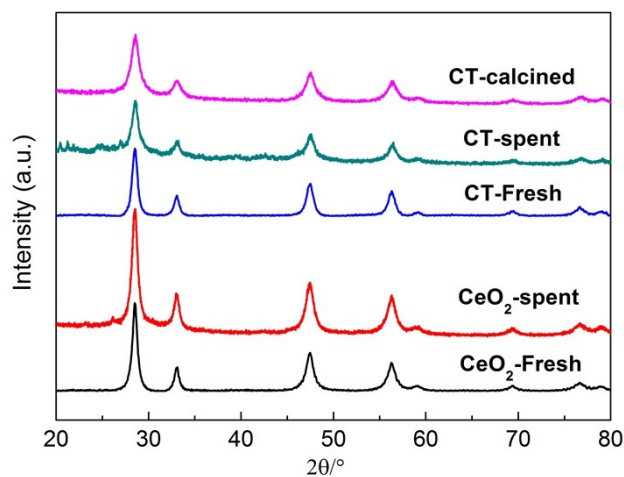**Figure S5.** XRD results of postreaction catalysts.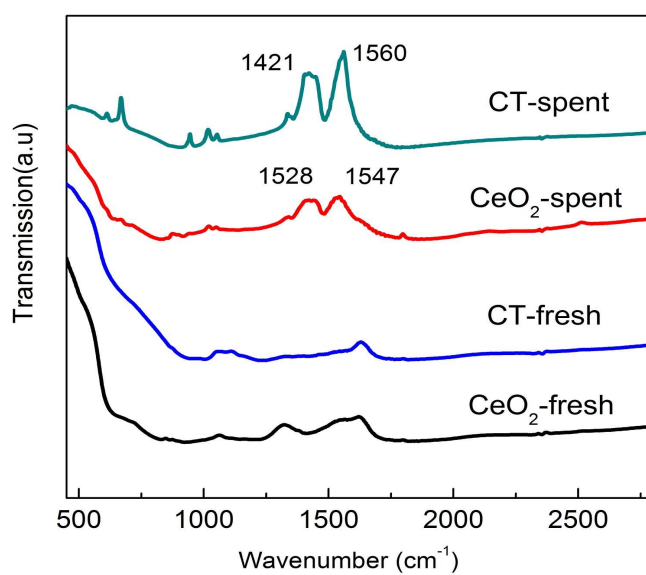

**Figure S6.** FTIR results of postreaction catalysts.

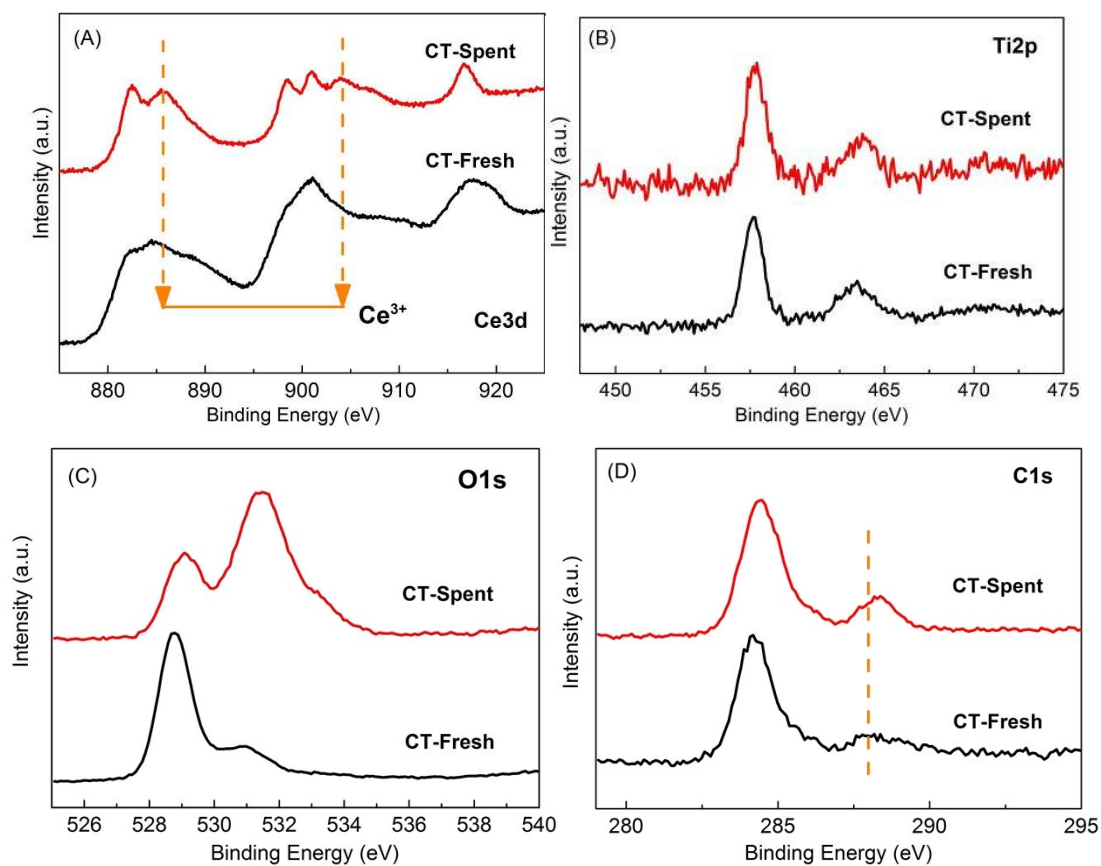

**Figure S7.** XPS results of the spent and fresh  $\text{Ce}_{0.7}\text{Ti}_{0.3}\text{O}_{2-\delta}$  catalyst.

References:

- [1] Y. Yamada, M. Segawa, F. Sato, T. Kojima, S. Sato, *J. Mole. Catal. A: Chem.*, 346 (2011) 79-86.
- [2] J. Das, K. Parida, *React. Kinet. Catal. Lett.*, 69 (2000) 223-229.
- [3] H. Bayahia, E. F. Kozhevnikova, I. V. Kozhevnikov, *Appl. Catal. B*, 165 (2015) 253-259.
- [4] C. Liu, A. M. Karim, V. M. Lebarbier, D. Mei, Y. Wang, *Top. Catal.*, 56 (2013) 1782-1789.
